# Supplementary material for: Vanadyl C and N-capped tris(phenolate) complexes: influence of pro-catalyst geometry on catalytic activity
Source: Royal Society of Chemistry journal article supplement (doi:10.1039/b606897a), 2006-01-01
Supplement: b606897a-2.pdf [file b606897a-2.pdf]

ESI Crystal Data for compounds **1-5** and **LH<sub>3</sub>**.

|                          | <b>1</b>                                                       | <b>2</b>                                                          | <b>3</b>                                                        | <b>4</b>                                            | <b>5</b>                                                        | <b>LH<sub>3</sub></b>                           |
|--------------------------|----------------------------------------------------------------|-------------------------------------------------------------------|-----------------------------------------------------------------|-----------------------------------------------------|-----------------------------------------------------------------|-------------------------------------------------|
| formula                  | C <sub>86</sub> H <sub>122</sub> O <sub>8</sub> V <sub>2</sub> | C <sub>104</sub> H <sub>144</sub> N <sub>2</sub> O <sub>7</sub> V | C <sub>20</sub> H <sub>15</sub> N <sub>2</sub> O <sub>4</sub> V | C <sub>24.5</sub> H <sub>24</sub> NO <sub>5</sub> V | C <sub>27</sub> H <sub>24</sub> N <sub>3</sub> O <sub>4</sub> V | C <sub>52</sub> H <sub>73</sub> NO <sub>3</sub> |
| fw                       | 1385.72                                                        | 1585.15                                                           | 398.28                                                          | 463.39                                              | 505.43                                                          | 760.11                                          |
| <i>T</i> /K              | 150(2)                                                         | 120(2)                                                            | 150(2)                                                          | 120(2)                                              | 120(2)                                                          | 150(2)                                          |
| radiation source         | sealed tube                                                    | rotating anode                                                    | synchrotron                                                     | synchrotron                                         | synchrotron                                                     | synchrotron                                     |
| wavelength /Å            | 0.71073                                                        | 0.71073                                                           | 0.6892                                                          | 0.6751                                              | 0.6751                                                          | 0.8464                                          |
| crystal system           | triclinic                                                      | monoclinic                                                        | monoclinic                                                      | monoclinic                                          | monoclinic                                                      | triclinic                                       |
| space group              | <i>P</i> 1                                                     | <i>P</i> 2 <sub>1</sub> / <i>c</i>                                | <i>P</i> 2 <sub>1</sub> / <i>n</i>                              | <i>P</i> 2 <sub>1</sub> / <i>c</i>                  | <i>P</i> 2 <sub>1</sub>                                         | <i>P</i> 1                                      |
| colour                   | red                                                            | pale green                                                        | blue                                                            | blue                                                | blue                                                            | yellow/green                                    |
| <i>a</i> /Å              | 12.1275(8)                                                     | 15.4639(8)                                                        | 9.6923(18)                                                      | 23.7193(13)                                         | 9.2526(7)                                                       | 14.452(2)                                       |
| <i>b</i> /Å              | 13.7705(10)                                                    | 30.6728(17)                                                       | 11.754(2)                                                       | 9.6174(5)                                           | 25.7210(18)                                                     | 14.819(2)                                       |
| <i>c</i> /Å              | 13.8307(10)                                                    | 21.4928(9)                                                        | 16.214(3)                                                       | 21.0836(12)                                         | 9.8995(7)                                                       | 14.999(2)                                       |
| <i>α</i> /°              | 104.984(2)                                                     | 90                                                                | 90                                                              | 90                                                  | 90                                                              | 116.865(2)                                      |
| <i>β</i> /°              | 104.898(2)                                                     | 107.107(3)                                                        | 107.213(4)                                                      | 116.030(2)                                          | 90.085(2)                                                       | 116.214(2)                                      |
| <i>γ</i> /°              | 105.394(2)                                                     | 90                                                                | 90                                                              | 90                                                  | 90                                                              | 91.421(3)                                       |
| <i>V</i> /Å <sup>3</sup> | 2015.2(2)                                                      | 9743.5(8)                                                         | 1764.5(6)                                                       | 4321.7(4)                                           | 2355.9(3)                                                       | 2467.8(7)                                       |
| <i>Z</i>                 | 1                                                              | 4                                                                 | 4                                                               | 8                                                   | 4                                                               | 2                                               |
| <i>R</i> 1               | 0.0567                                                         | 0.1009                                                            | 0.0432                                                          | 0.0439                                              | 0.0431                                                          | 0.0776                                          |
| GOF                      | 1.056                                                          | 1.036                                                             | 1.042                                                           | 1.004                                               | 1.057                                                           | 1.033                                           |
