# Supplementary material for: Vanadyl C and N-capped tris(phenolate) complexes: influence of pro-catalyst geometry on catalytic activity
Source: Royal Society of Chemistry journal article supplement (doi:10.1039/b606897a), 2006-01-01

ESI Figures.

All figures are at the 40% probability level and include all atoms in the asymmetric unit or complete molecules.

Compound 1 below:

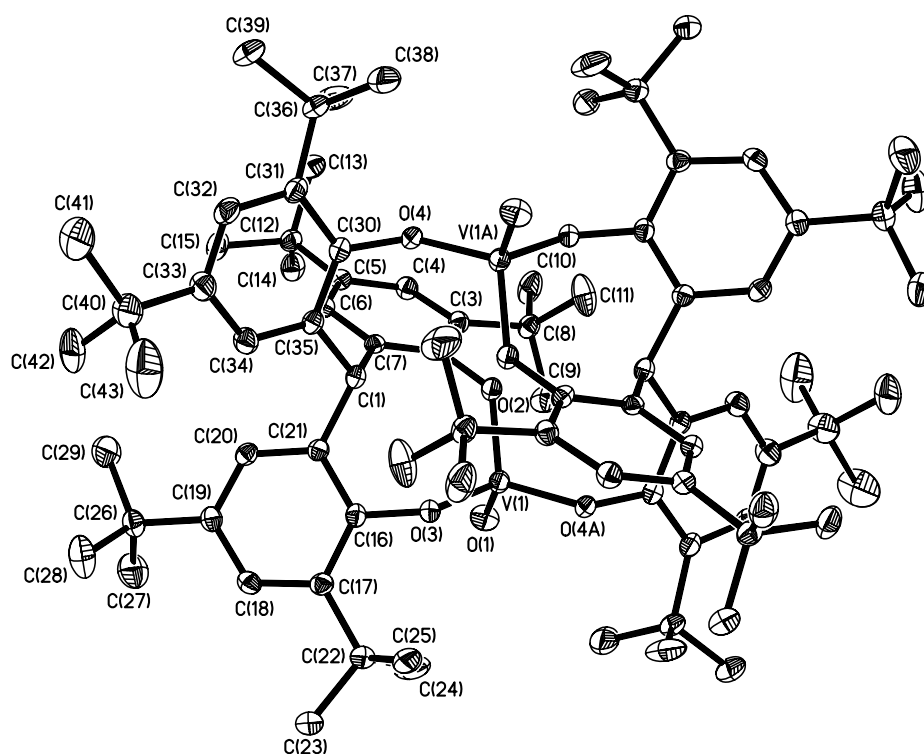

Compound 2 below:

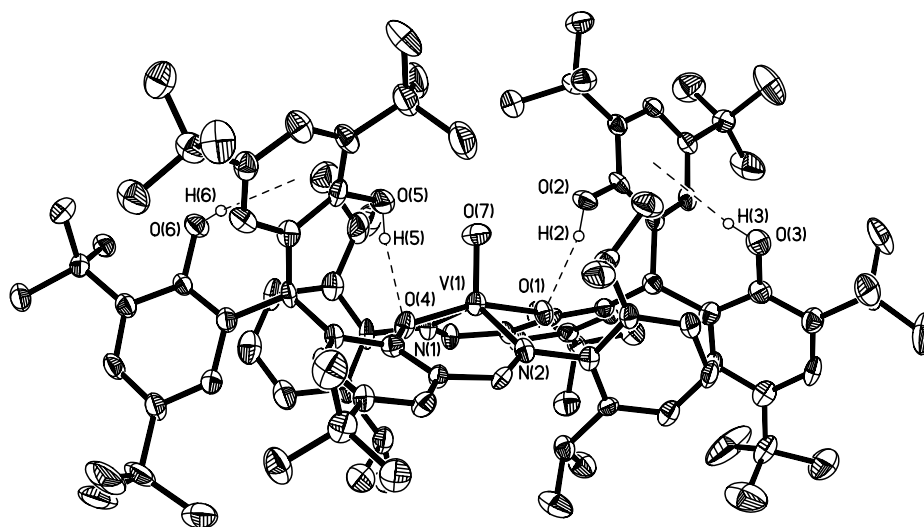

Compound **3** below:

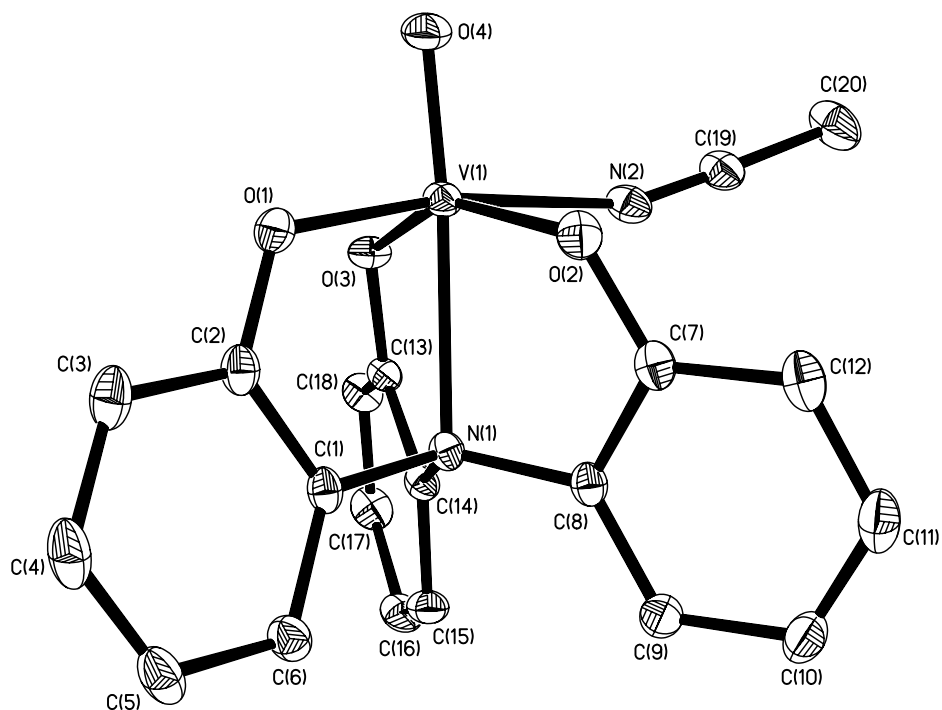

Compound **4** below:

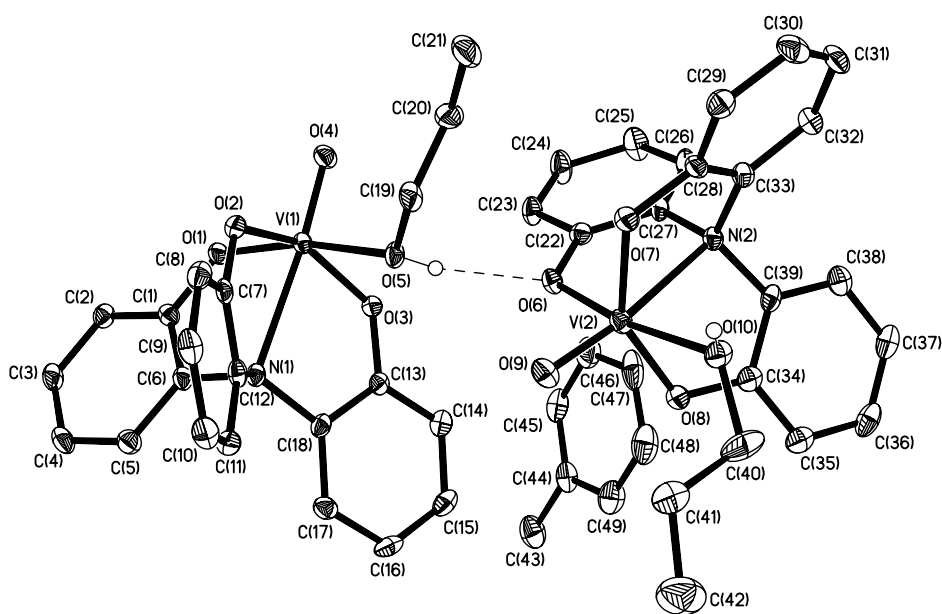

Supplement: b606897a-3.pdf [file b606897a-3.pdf]
